# Supplementary material for: Integrating Cultural Sites into the Sesia Val Grande UNESCO Global Geopark (North-West Italy): Methodologies for Monitoring and Enhancing Cultural Heritage
Source: MDPI journal article supplement (doi:10.3390/heritage6090322), 2023-08-27
Supplement: s1 [file s1]

## **Sondaggio per Turisti**

**Gentile Turista / Dear Tourist**

Ti preghiamo di dedicare alcuni minuti del suo tempo per completare il seguente sondaggio.

Siamo membri di un progetto di ricerca dell'Università di Torino riguardante la valorizzazione del patrimonio geologico per lo sviluppo sostenibile, e il Geoparco Sesia Val Grande è il nostro caso studio.

Con la compilazione del seguente questionario ci aiuti a comprendere meglio quale è la tua percezione del territorio e della sua evoluzione e cosa dobbiamo fare per valorizzarlo e tutelarlo al meglio: il tuo tempo e le tue risposte sono per noi fondamentali per capire quale direzione deve prendere il nostro lavoro per proporre azioni di sviluppo sostenibile dell'area e migliorare l'offerta turistica.

**IL QUESTIONARIO È ANONIMO**

//

Please take a few minutes of your time to complete the following survey.

We are members of a research group of the University of Turin concerning the enhancement of geoheritage for sustainable development, and Sesia Val Grande UGGp is our case study.

By filling in the following questionnaire, you are helping us to better understand what your perception of the area and its development is, and what we need to do to best enhance and protect it: your time and your answers are fundamental for us to understand what direction our work should take in order to propose actions for the sustainable development of the area and to improve the tourist offer.

**THE SURVEY IS ANONYMOUS**

TI CHIEDIAMO DI ASSEGNARE DEI PUNTEGGI IN BASE A QUANTO SEI INTERESSATO AI GEOSITI E AI SITI CULTURALI PRESENTI NEL GEOPARCO. ASSEGNA UN VALORE DA 1 A 5 AI SEGUENTI GEOSITI o SITI CULTURALI: 1 POCO INTERESSANTE, 5 MOLTO INTERESSANTE

/

FROM THIS POINT WE WILL ASK YOU TO ASSIGN SCORES BASED ON INTEREST IN GEOSITES AND CULTURAL SITES IN THE GEOPARK. ASSIGN A VALUE FROM 1 TO 10 TO THE FOLLOWING GEOSITES or CULTURAL SITES: 1 UNINTERESTING, 10 VERY INTERESTING

## 1-10 Geositi / Geosites

1 poco interessante, 5 molto interessante / 1 little importance, 5 much importance

|                               | 1                     | 2                     | 3                     | 4                     | 5                     | non lo conosco/non sono interessato* |
|-------------------------------|-----------------------|-----------------------|-----------------------|-----------------------|-----------------------|--------------------------------------|
| Ghiaccia Monte Rosa           | <input type="radio"/>                |
| Cava di Candoglia             | <input type="radio"/>                |
| Valle d'Otro                  | <input type="radio"/>                |
| Val Pogallo                   | <input type="radio"/>                |
| Cimalegna                     | <input type="radio"/>                |
| Miniere d'Oro di Alagna       | <input type="radio"/>                |
| Sacro monte di Varallo        | <input type="radio"/>                |
| Peridotite di Balmuccia       | <input type="radio"/>                |
| Chiesa di Albo                | <input type="radio"/>                |
| Pietra ollare della Val Loana | <input type="radio"/>                |

\*I don't know it /I'm not interested

## 2-20 Siti culturali / Cultural sites

1 poco interessante, 5 molto interessante / 1 little importance, 5 much importance

[illegible]

\*I don't know it /I'm not interested

**21 Credi che all'interno del Geoparco sia più importante tutelare e promuovere i geositi o i siti culturali? / Do you think that within the Geopark it is more important to protect and promote geosites or cultural sites?**

Geositi

-5 -4 -3 -2 -1 0 1 2 3 4 5

Siti Culturali

Geosites

Cultural Sites
